1 A defensive body plan was pre-adaptive for termitophily in the rove beetle tribe  
2 Termitohospitini (Staphylinidae: Aleocharinae).

3  
4

5 T. Kanao<sup>1</sup>, K.T. Eldredge<sup>2\*</sup>, M. Maruyama<sup>3</sup>

6  
7

☉ These authors contributed equally to the publication.

8  
9

\* Corresponding author.

10

11 <sup>1</sup> Graduate School of Human and Environmental Studies, Kyoto University, Nihonmatsu-cho,  
12 Sakyo-ku, Kyoto 606-8501, Japan.

13

14 <sup>2</sup> Department of Ecology and Evolutionary Biology, and Division of Entomology, Biodiversity  
15 Institute 1501 Crestline Drive, Suite 140 University of Kansas. [taroeldredge@gmail.com](mailto:taroeldredge@gmail.com)

16

17 <sup>3</sup> The Kyushu University Museum, Fukuoka, 812-8581 Japan.

18

19

20 ABSTRACT

21

22 Termitophily—the symbiosis of organisms with termite societies—has evolved a  
23 disproportionate number of times within the rove beetle subfamily Aleocharinae (Staphylinidae).  
24 Among aleocharine termitophiles, defensive (limuloid) and mimetic (physogastric &  
25 physothoracic) body forms have evolved convergently, but due to lack of a comprehensive  
26 aleocharine phylogeny, the context in which termitophily and associated adaptations evolve is  
27 unknown. We present the first example of a robust, morphology-based phylogenetic placement  
28 of an exclusively termitophilous tribe, the Termitohospitini. Termitohospitini is recovered to be  
29 nested within Myllaenini *sensu nov*, and sister to Myllaena (new synonymy). Furthermore, we  
30 also recovered the small tribe Masuriini nested within Myllaenini *sensu nov* (new status).

31 Reconstructing ecological transitions within this clade, we present evidence that the stem lineage  
32 of Myllaenini sensu nov invaded intertidal marine habitats, the common ancestor for Myllaena +  
33 Termitohospitini then transitioned to freshwater riparian habitats, with Termitohospitini alone  
34 subsequently shifting to termitophily. We conclude that: (1) Termitohospitini was ancestrally a  
35 limuloid-bodied riparian inhabitant; (2) a limuloid form may have been pre-adaptive for defense  
36 against host attack during the evolution of termitophily; (3) the strongly tapered abdomen of an  
37 ancestral limuloid body was a constraint on the evolution of physogastry, leading to the  
38 emergence of the unusual physothoracic body form observed in termitohospitines that likely  
39 integrates these obligate termitophiles to life inside termite colonies.

40

41 KEYWORDS

42

43 Intertidal, adaptation, coevolution, phylogeny, systematics, Myllaenini, Pronomaeini, Masuriini,  
44 marine, Isoptera

45

46

47 “one of the most astonishing spectacles in all natural history.” — Richard Dawkins

48

49

50 INTRODUCTION

51

52 Some of the most ecologically complex and taxonomically diverse organismal  
53 interactions center around the societies of social insects, in particular those of ants and termites  
54 (Rettenmeyer et al. 2011, Kistner 1979, 1982, Hölldobler & Wilson 1990, Parker 2016).  
55 Organisms that have evolved symbioses with ants and termites are termed myrmecophiles and  
56 termitophiles, respectively, and as a group these symbionts display a bewildering array of  
57 morphological and behavioral specializations. Among termitophiles, two body forms, mimetic  
58 (Figs. 8–9B) and defensive (Figs. 1–7), have convergently evolved numerous times. Mimetic  
59 species typically possess swollen “physogastric” or “physothoracic” (Figs. 8–9B) body forms—  
60 the consequence of increased fat body growth that results in a grotesquely expanded body,  
61 stretching out the intersegmental membrane between sclerites. Physogastry is thought to

62 transform the sclerotized body into one that resembles the relatively soft-bodied host termites  
63 (Cunha et al. 2015), often to a striking degree (Dawkins 1996, Kistner 1969). In such species,  
64 body segments begin to distend soon after the adults eclose (post-imaginal growth) (Kistner  
65 1969), and in some instances elongation of leg segments even occurs, breaking the cardinal rule  
66 that arthropods grow by moulting. In defensive, or limuloid (horseshoe crab shaped) groups, the  
67 abdomen is posteriorly tapered, lateral margins of the body are typically expanded and head  
68 deflexed, protecting vulnerable appendages dorsally from attack (Figs. 1–4, 6–7) (Kistner 1979,  
69 Parker 2016).

70         Across the Arthropoda, termitophily has evolved only rarely, if at all (REF #####). One  
71 exception is the rove beetle subfamily Aleocharinae, where this lifestyle has arisen at least 11  
72 times, and over 650 described species are known to be symbiotic with termites (Kistner 1969,  
73 Kanao et al. 2012). Such an exceptional predisposition to evolving this type of symbiosis raises  
74 an immediate question over potential traits that might be pre-adaptive for the aleocharine  
75 capacity to successfully invade termite nests. One approach to identifying putative pre-  
76 adaptations is to explore the evolutionary interplay between morphological and ecological  
77 specializations leading up to independent origins of termitophily across the Aleocharinae  
78 phylogeny. However, a major impediment exists in the lack of phylogenetic resolution in  
79 Aleocharinae, and in the social insect symbiont lineages in particular (Ashe 2007). Consequently,  
80 we have little understanding of the ecological contexts within which termitophily evolves among  
81 aleocharines, and the character transformations leading to the specialized morphologies seen in  
82 many termitophilous clades. This phylogenetic impediment is particularly due to the taxonomic  
83 challenges one confronts with Aleocharinae; their small size often obscure species level  
84 differences, and vast taxonomic diversity impedes their study (there are 16,468 described species,  
85 making them the largest animal subfamily [Newton unpublished data]) (Ashe 2007).  
86 Compounding the situation, social insect symbionts are notoriously challenging to collect due to  
87 their low abundances (similar to army ant symbionts [Kistner 1979]) and difficulty in extracting  
88 them from inside nests (Kistner 1998, personal observations).

89         During a survey of aleocharine morphology, conducted for a comprehensive  
90 morphological treatment of the subfamily (Eldredge in prep.), we discovered that the lacinia (a  
91 food gathering structure of the mouthparts [Betz et al. 2003]) of one specialized termitophilous  
92 tribe, Termitohospitini (Figs. 1–10B, S4), is strikingly similar to Myllaenini (Figs. 11A–11B, S4),

93 a tribe notable for genera that have specialized on marine-intertidal and freshwater-margin  
94 habitats, but which are entirely free-living. Furthermore, a previous study has suggested that the  
95 particular lacinial morphology of Myllaenini is in part characteristic for the tribe (Ahn & Ashe  
96 2004). Despite the marked ecological disparity between termitohospitines and myllaenines,  
97 further examination revealed the genus Myllaena (Myllaenini) and many termitohospitines  
98 shared a unique sensory organ on the aboral surface of maxillary palpomere 3 (Figs. 12A–12B).  
99 Therefore, we hypothesized a priori that a phylogenetic analysis would reveal the inclusion of  
100 Termitohospitini within a broader Myllaenini, and a sister-group relationship between Myllaena  
101 + Termitohospitini. Here, we present the first instance of a robust phylogenetic hypothesis  
102 concerning the common ancestry of a termitophilous aleocharine lineage, Termitohospitini,  
103 providing a unique opportunity to explore the sequence of morphological and ecological  
104 character evolution leading to the origin of symbiosis in a termitophilous aleocharine lineage.

105

106

107 Materials and Methods

108

109 Specimen Work

110

111 Specimens for this study were made available by the Snow Entomological Museum  
112 Collection (University of Kansas) and numerous field expeditions conducted by Kanao and  
113 Maruyama (also see Acknowledgements). We again emphasize that symbionts of social insects  
114 are exceedingly rare and the difficult to collect. Symbionts number one per thousands of colony  
115 members, and nests are often subterranean and inaccessible (Kistner 1979, 1998).

116 To examine the morphology, typical procedures were taken of KOH tissue digestion,  
117 chlorazol black staining, examination in glycerin, and permanent mounting in Euparal (for  
118 details see Eldredge 2012 Hanley & Ashe 2003, Maruyama 2004). Light- (Olympus SZX7  
119 stereomicroscope and Olympus BX51 compound microscope) and scanning electron microscopy  
120 was used for morphological examination. Whole body images were taken using a Visionary  
121 Digital™ BK Plus Lab System with Cannon EOS 7D. Images were captured from multiple focal  
122 planes and combined with CombineZM

123 (<http://hadleyweb.pwp.blueyonder.co.uk/CZM/News.htm>).

124

## 125 Dataset Construction

126

127 For this study, we modified the dataset of Ahn & Ashe (2004). Sixteen taxa and nine  
128 additional characters were added for a total matrix dimension of 74 taxa by 108 characters (S1–  
129 2). The dataset was constructed and handled in Mesquite v3.1.0 (Maddison & Maddison 2016).

130

## 131 Phylogenetic Analyses

132

133 Parsimony analyses were done with TNT v1.1 (Goloboff et al. 2000) implementing ratchet  
134 and drift algorithms to increase exploration of tree space, and 1,000 bootstrap replicates were  
135 performed. Analyses were done locally.

136 The Bayesian reconstructions were analyzed in MrBayes v3.2.6 (Ronquist & Hulsenbeck  
137 2003) using the Mkv model (Lewis 2001). Several strategies to account for among site character  
138 rate differences were implemented by modifying the Mkv model. Gamma rates with four and  
139 eight rate categories were implemented in MrBayes v3.2.6 hosted by CIPRES Science Gateway  
140 (Miller et al. 2010), and a log-normal distribution was implemented with a modified version of  
141 MrBayes (Harrison & Larsson 2015) hosted by KINBRE (University of Kansas). Analyses were  
142 run for at least 50 million generations and was monitored with Tracer v1.5 (Rambaut &  
143 Drummond 2007) to confirm ample mixing. Sampled trees were summarized with DendroPy  
144 v3.12 (Sukumaran & Holder 2010).

145 PAUP\* v4.0b10 (Swofford 2002) and WinClada v1.00.08 (Nixon 2002) were used to plot  
146 apomorphies. Ancestral state reconstructions were performed using a Mk likelihood  
147 reconstruction available in Mesquite v3.1.0.

148 We initially began by reanalyzing the Ahn & Ashe (2004) dataset with the objective of  
149 adding termitohospitine representatives for preliminary insight. During this course, we  
150 discovered errors in the published dataset, preventing reconstruction of the presented results.  
151 Through author correspondence the source of error was identified and corrections are reflected in  
152 the dataset presented in this study (S2).

153

## 154 Results

155

156 Phylogeny Reconstruction

157

158 Parsimony

159 106 most parsimonious trees of 785 steps were recovered (majority rule consensus tree,  
160 Fig. 14). Termitohospitini was recovered monophyletic with strong support (92% bootstrap),  
161 notably supported by the anterior migration of the anterior tentorial pits (char. 99:1) and  
162 antennae set in acetabullae (char. 100:1) (Figs. 13a–13b, S6–7). Further, Termitohospitini was  
163 recovered sister to Myllaena, which in turn is sister to Dimonomera and nested deep within the  
164 Myllaenini. The sister-group relationship of Termitohospitini and Myllaena was found to be  
165 supported by the presence of a unique sensory structure on maxillary palpomere 3 (char. 103:1)  
166 (Figs. 12a–12b).

167 A clade consisting of Myllaenini sensu Ahn & Ashe was recovered to share a most recent  
168 common ancestor with Dysacryta and Masuria (Masuriini): Myllaenini sensu nov. Myllaenini  
169 sensu nov is supported by, among others, the unique lacinial morphology of large interdigitating  
170 setae (char. 26:2) (Figs. 11A–11B, S4). Pronomaeini was not recovered sister to Myllaenini  
171 sensu nov.

172 The genus *Rothium* was rendered paraphyletic by *Lautaea murphyi*, which formed a clade  
173 with *R. pallidus*, *R. giulianii* and *R. sonorensis*; *Brachypronomaea esakii* and *Polypea coralli*  
174 formed a clade with *R. ashlocki* and *R. evansi*. The *Lautaea* clade is not supported by a clear  
175 synapomorphy, but the *Brachypronomaea* clade is supported by the mentum being medially  
176 squarely produced (char. 108:1).

177 A clade consisting of *Bryothinusa*, Genus1, Genus2, *Amazonopora*, *Dimonomera*,  
178 *Myllaena*, and *Termitohospitini* was recovered in all analyses: *Myllaenini sensu stricto*, which is  
179 supported by a four-articled mid tarsi (char. 105:1) among other characters, but no unambiguous  
180 changes support this node.

181 The monophyly of *Bryothinusa* was unresolved in the Bayesian analyses, but was  
182 recovered in the parsimony analysis. *Bryothinusa* monophyly is supported by an incomplete  
183 infraorbital carina (char. 5:1) and quadrate pronotum (char. 57:3).

184 Very little support was recovered overall. Most of the recovered nodes failed to generate  
185 any support, and those that did were concentrated at the deepest nodes and tips.

186

187 Bayesian

188 The general results were similar to those recovered from a parsimony analysis (Figs. 15–  
189 16). Termitohospitini was recovered monophyletic and sharing a MRCA with Myllaena and  
190 Dimonomera in all analyses with strong support. The general topology of Myllaenini sensu  
191 stricto is similar with the parsimony results, but less resolved. In particular, the Bayesian  
192 analyses failed to support the monophyly of Bryothinusa which remains unresolved. In all the  
193 analyses, Lautaea was recovered sister to Genus 3, differing from the parsimony analysis.

194 In the Mkv+G4 analysis (Fig. 15), besides from Rothium ashlocki + R. evansi, Masuria and  
195 Lautaea + Genus3, a significant proportion of Myllaenini sensu nov members were unresolved in  
196 their placement.

197 In the Mkv+G8 analysis (Fig. 16), Myllaenini sensu nov was recovered but with little  
198 support. Besides from Rothium ashlocki + R. evansi, the placement of Rothium, Polypea and  
199 Brachypronomaea was unresolved.

200

201 Character Evolution

202

203 Ground/leaf litter habitat was recovered ancestral for Myllaenini sensu nov (Fig. 18). The  
204 group subsequently transitioned from riparian to marine, and reverted back to riparian habitat  
205 before infiltrating termite nests with Termitohospitini. Myllaenini sensu nov is ancestrally  
206 parallel-sided. Limuloid form evolved twice, once in the mangrove swamp inhabiting Lautaea  
207 murphyi and the common ancestor of Dimonomera + Myllaena + Termitohospitini, transitioning  
208 to physogastry and physothoracy within the termitohospitines. The ancestral state for the MRCA  
209 of Coptoxenus + Coptophysa + Coptophysella is ambiguous.

210

211 Taxonomy

212

213 Taxonomy proposed by Ahn & Ashe (2004):

214

215 Myllaenini sensu Ahn & Ashe

216 = Dimonomerini (Ashe 1999)

217 Amazonopora  
218 Brachypronomaea  
219 Bryothinusa  
220 Dimonomera  
221 Dysacrita  
222 Lautaea  
223 Myllaena  
224 Philomina  
225 Polypea  
226 Rothium

227

228 The following updated taxonomic scheme is proposed following the results of this study:

229 Myllaenini *sensu nov*

230 = Dimonomerini (Ashe 1999)

231 = Masuriini (new status)

232 = Termitohospitini (new synonymy)

233 *Amazonopora*

234 *Brachypronomaea*

235 *Bryothinusa*

236 *Dimonomera*

237 *Dysacrita*

238 *Lautaea*

239 *Masuria*

240 *Myllaena*

241 *Philomina*

242 *Polypea*

243 *Rothium*

244 *Blapticoxenus*

245 Termitohospitina

246 *Coptophysa*

247 *Coptophysella*



248 *Coptotermocola*  
249 *Coptoxenus*  
250 *Hetairotermes*  
251 *Japanophilus*  
252 *Neotermitosocius*  
253 *Paratermitosocius*  
254 *Sinophilus*  
255 *Termitobra*  
256 *Termitohospes*  
257 *Termitosodalis*

258

259

260 DISCUSSION

261

262 Ecological Origins of Termitophily

263

264 Termites are generally ground inhabiting social insects. By extension of the ground  
265 habitat, some inhabit dead wood, but the majority build subterranean nests that may be  
266 accompanied by above-ground architecture. Therefore, we logically expected that termitophilous  
267 lineages would have a similar ancestral ecology, living on the ground/leaf litter or in dead and  
268 decaying wood. Counter to this notion, we recovered a freshwater-riparian habitat-type for the  
269 common ancestor of Myllaena + Termitohospitini. This is surprising, since riparian habitats are  
270 notoriously underutilized by termites (as well as by ants). A fraction of Myllaena inhabit  
271 ground/leaf litter in the tropics, and it is possible that these ground environments are quite  
272 saturated, acting as transitional habitats between riparian zones and more strict terrestriality. We  
273 hypothesize that termitohospitines evolved from ancestors that ventured into soaked ground/leaf  
274 litter habitats in a tropical environmental setting. Furthermore, we posit that certain extant  
275 Myllaena lineages are currently experimenting with this riparian-to-ground habitat transition.

276

277 Pre-adaptation and Subsequent Constraint of the Limuloid Body Plan

278

279           Although we observe a parallel-sided body as ancestral for Myllaenini sensu nov,  
280 reconstruction shows that Termitohospitini evolved from a limuloid ancestor. Dimonomera and  
281 Myllaena are very similar in form overall, which suggests that Termitohospitini evolved from a  
282 Myllaena-like, limuloid-bodied ancestor. For riparian limuloid aleocharines like Myllaena, the  
283 limuloid body plan is used for pushing, wedging and weaving through substrate. Analogous  
284 examples are *Gymnusa* and *Deinopsis*, early diverging (Ashe 2005) free-living riparian  
285 aleocharines that have similar body forms and live in similar habitats. There appears to be a  
286 negative correlation between “limuloid-ness” and abdominal flexibility. The more tapered the  
287 abdomen, the less flexible it becomes. Again, *Gymnusa* and *Deinopsis* represent analogues of  
288 this phenomenon.

289           In contrast, limuloid bodies in social insect symbionts are adaptive for defense against  
290 host attack. The numerous examples of symbiotic aleocharines converging on limuloid  
291 ecomorphology are strong evidence of its adaptive nature (Parker 2016). In many examples, the  
292 dorsum of the body is broadly expanded laterally, shielding vulnerable appendages underneath.  
293 Termitohospitini were ancestrally limuloid but the mimetic physogastric or physothoracic shape,  
294 evolved from this limuloid ancestral condition. It is likely that the ancestral limuloid body plan  
295 was pre-adaptive for termitophily in the termitohospitines, catalyzing diversification in this niche.  
296 Such a scenario parallels a recent hypothesis for the evolution of termitophily elsewhere in  
297 Aleocharinae: in the tribes Trichopseniini and Mesoporini, quasi-limuloid morphology of a  
298 *Gymnusa-Deinopsis*-like ancestor is posited to have been preadaptive for specialization inside  
299 termite colonies (Yamamoto et al. 2016).

300           Interestingly, termitohospitines represent the sole example of physothoracy in the  
301 Aleocharinae (Figs. 8–9B). There may be several explanations for this uniqueness. Physothoracy  
302 may be a strategy to achieve mimicry when the abdomen is too inflexible to easily evolve  
303 physogastry. Indeed, a relatively inflexible abdomen appears to be correlated with the limuloid  
304 body plan that termitohospitines inherited from a Myllaena-like ancestor. Alternatively,  
305 physothoracy may represent an intermediate state toward full physogastry, or perhaps functions  
306 as a wholly different function inside colonies, unrelated to social integration. Due to the limited  
307 number of species of mimetic termitohospitines, it is presently difficult to establish the polarity  
308 of this character, which might help distinguish between these alternatives. Consequently,  
309 reconstruction of the MRCA of the mimetic termitohospitine clade remains unresolved (Fig. 18).

310

311 Mouthpart Degradation: A Result of Adaptation to Trophallaxis

312

313 A conspicuous characteristic of Myllaenini sensu nov is their extremely stylate  
314 mouthparts that greatly extend past the apex of their head (i.e. clypeus). Although all of the  
315 mouthpart components are to some extent elongated, the most noticeable are the maxilla and  
316 labium. Observations of Myllaena in captivity revealed that the labium, which protrudes past all  
317 other mouthparts, is a highly extrusible structure. At rest, the labium is typically retracted into  
318 the recesses of the oral cavity, and does not visibly protrude, which is made possible by the  
319 elongate premental tendons (Eldredge pers. obs.).

320 The maxilla is the primary appendage used in food gathering, and the labium is primarily  
321 used for sensing. Observations of Bryothinusa have shown these beetles are carnivorous and also  
322 scavenge on small arthropods between sand particles in marine-intertidal habitats (Wong & Chan  
323 1977). Similarly elongate mouthparts are convergently found in the riparian limuloid genera  
324 *Gymnusa* and *Deinopsis*. Observations of *Gymnusa* showed these beetles are carnivorous, and  
325 when feeding, probed the food item with the labium and gathered food with the maxilla  
326 (Eldredge pers. obs.). Using these examples of correlated form and function as evidence for a  
327 dietary type, Myllaenini appears to be a predaceous tribe; the flexible and elongate labium is  
328 probably used to probe substrate interspaces to search for food, and the stylate maxilla used for  
329 extracting interstitial food items.

330 The large interdigitated teeth are a synapomorphy for Myllaenini sensu nov (S5), but many  
331 of the termitohospitines have much shorter and curved maxillae (Figs. 11a–11b, S5).

332 Degradation of the mouthparts is a common theme among social insect symbionts, and is thought  
333 to be correlated to a simplified diet: feeding on soft-bodied brood or directly fed by workers.

334 Until recently, the diet of Termitohospitini was unknown, but observations of beetles in culture  
335 have revealed that Termitohospitini are fed trophallactically by host termite workers, and also  
336 groom and are groomed by the workers (Figs. 10a–10b). Grooming host termites may also allow  
337 the beetles to collect colony-specific odors. We suggest that degradation of mouthpart  
338 morphology is adaptive for this transition from a predatory diet to one based around trophallaxis  
339 and grooming. Notably, the Termitohospitini genus *Termitosocius* possesses the elongate, more  
340 stylate mouthparts characteristic of free-living Myllaenini sensu nov. We therefore speculate that

341 *Termitosocius* is early-diverging among Termitohospitini, retaining the ancestral predatory diet  
342 within termite nests.

343

344 Putting It All Together: Evolutionary Origins of Termitophily in Termitohospitini

345

346 Our reconstructions show that termitohospitines evolved from a riparian limuloid  
347 ancestor with stylate mouthparts. We hypothesize that transitioning to a more terrestrial  
348 environment caused an increase in the frequency of interactions with termites, and the limuloid  
349 defensive form was pre-adaptive for protection against termite aggression. Termitohospitini  
350 further modified the ancestral limuloid form by laterally expanding dorsal sclerites to shield  
351 vulnerable appendages underneath (Figs. 1–4, 6–7). Subsequently, some lineages evolved  
352 trophallactic behavior Fig. 10b), and the mouthparts degraded and shortened in length. Given this  
353 hypothesis, *Termitosocius* appears most primitive in overall morphology, and may embody what  
354 a stem termitohospitine might have looked like during the lineage's ecological transition to life  
355 inside termite colonies.

356

357

358 ACKNOWLEDGEMENTS

359

360 Collectively we thank Dr. Kee-Jeong Ahn for graciously providing us with original dataset, Dr.  
361 Zack Falin and Dr. Floyd Shockely for access to institutional collections, Dr. Takahashi Komatsu  
362 for image use, Mr. Taku Shimada for image use and sharing valuable observational data, and Dr.  
363 Joseph Parker for critical review of a draft.

364

365 LITERATURE CITED

366

367 Ahn, K.J. & J.S. Ashe. 2004. Phylogeny of the Myllaenini and related taxa (Coleoptera:  
368 Staphylinidae: Aleocharinae). *Cladistics* 20:123–138.

369 Ashe, J.S. 1999. Redescription and phylogenetic position of the unusual aleocharine  
370 staphylinid *Dimonomera indica* Cameron, 1933 (Coleoptera: Staphylinidae: Aleocharinae:  
371 *Dimonomerini*). *Journal of the New York Entomological Society*, 107(1): 55–63.

- 372 Ashe, J.S. 2005. Phylogeny of the tachyporine group subfamilies and “basal” lineages of the  
373 Aleocharinae (Coleoptera: Staphylinidae) based on larval and adult characteristics.  
374 Systematic Entomology, 30: 3–37.
- 375 Ashe, J.S. 2007. Aleocharinae. Version 25 April 2007.  
376 <http://tolweb.org/Aleocharinae/9777/2007.04.25> in The Tree of Life Web Project,  
377 <http://tolweb.org/>
- 378 Betz, O., M.K. Thayer & A.F. Newton. 2003. Comparative morphology and evolutionary  
379 pathways of the mouthparts in spore-feeding Staphylinoida (Coleoptera). Acta Zool  
380 (Stockholm) 84:179–238.
- 381 Cunha, H.F., J.S. Lima, L.F. Souza, L.G.A. Santos, J.C. Nabout. 2015. No morphometric  
382 distinction between the host *Constrictotermes cyphergaster* (Silvestri) (Isoptera: Termitidae,  
383 Nasutitermitinae) and its obligatory termitophile *Corotoca melantho* Schiødte (Coleoptera:  
384 Staphylinidae). Sociobiology, 62(1): 65–69.
- 385 Dawkins, R. 1996. Climbing Mount Improbable. W.W. Norton and Company, London.
- 386 Goloboff, P.A., J.S. Farris, K.C. Nixon. 2000. TNT a free program for phylogenetic analysis.  
387 Cladistics, 24: 774–486.
- 388 Hanley, R.S. & J.S. Ashe. 2003. Techniques for dissecting adult aleocharine beetles (Coleoptera:  
389 Staphylinidae). Bulletin of Entomological Research, 93: 11–18.
- 390 Harrison, L.B. & H.C.E. Larsson. 2015. Among-character rate variation distributions in  
391 phylogenetic analysis of discrete morphological characters. Systematic Biology, 64(2): 307–  
392 324.
- 393 Hölldobler, B. & E.O. Wilson. 1990. The Ants. Harvard University Press, Cambridge, MA.
- 394 Kanao, T., K.T. Eldredge, M. Maruyama. 2012. Two new genera and species of the termite  
395 symbiont lineage *Termitohospitini* (Coleoptera, Staphylinidae, Aleocharinae) from Bolivia  
396 and peninsular Malaysia. ZooKeys, 254: 67–87.
- 397 Kistner, A.C. 1998. An Affair with Africa: Expeditions And Adventures Across A Continent.  
398 Island Press, Washington D.C.
- 399 Kistner, D. H. 1969. The biology of termitophiles. In: K. Krishna and F. M Weesner (Editors).  
400 Biology of termites , pp. 525–557. Academic Press. New York, NY, United States of  
401 America. 598 pp

- 402 Kistner, D.H. 1979. 8. Social and evolutionary significance of social insect symbionts. In H. R.  
403 Hermann, ed., *Social insects*, Vol. 1, pp. 339-413. Academic Press, New York.
- 404 Kistner, D.H. 1982. The social insects' bestiary. Pp. 1-244. In H. R. Hermann (ed.), *Social*  
405 *Insects*, Vol. 3,. Academic Press, New York.
- 406 Lewis, P.O. 2001. A likelihood approach to estimating phylogeny from discrete morphological  
407 character data. *Systematic Biology*, 50(6): 913–925.
- 408 Maddison, W. P. and D.R. Maddison. 2016. Mesquite: a modular system for evolutionary  
409 analysis. Version 3.10 <http://mesquiteproject.org>
- 410 Maruyama, M. 2004. A Permanent Slide Pinned under a Specimen. *Elytra* 32(2):276.
- 411 Miller, M.A., W. Pfeiffer & T. Schwartz. 2010. Creating the CIPRES Science Gateway for  
412 inference of large phylogenetic trees. *Proceedings of the Gateway Computing Environments*  
413 *Workshop (GCE)*, 14 Nov. 2010, New Orleans, LA. Pp 1–8.
- 414 Nixon, K.C. 2002. WinClada, version 1.00.08. Published by the author, Ithaca, NY.
- 415 Parker, J. 2016. Myrmecophily in beetles (Coleoptera): evolutionary patterns and biological  
416 mechanisms. *Myrmecological News*, 22: 65–108.
- 417 Rambaut, A., A.J. Drummond, Tracer v1.4 (2007; <http://tree.bio.ed.ac.uk/software/tracer/>).
- 418 Rettenmeyer, C.W., M.E. Rettenmeyer, J. Joseph, S.M. Berghoff. 2011. The largest animal  
419 association centered on one species: the army ant *Eciton bruchellii* and its more than 300  
420 associates. *Insectes Sociaux*, 58: 281–292.
- 421 Ronquist, F. and J. P. Huelsenbeck. 2003. MRBAYES 3: Bayesian phylogenetic inference under  
422 mixed models. *Bioinformatics* 19:1572-1574.
- 423 Sukumaran, J. and M.T. Holder. 2010. DendroPy: a Python library for phylogenetic computing.  
424 *Bioinformatics* 26: 1569–1571.
- 425 Swofford 2003. PAUP\*: phylogenetic analysis using parsimony (\* and pother methods), version  
426 4.0b10.
- 427 Thayer, M.K. 2005. Staphylinidae Latreille, 1802. *Handbook of Zoology, Coleoptera, Beetles,*  
428 *Volume 1: Morphology and Systematics (Archostemata, Adepaga, Myxophaga, Polyphaga*  
429 *partim)* Vol. IV Part 38 (ed. by R.G. Beutel and R.A.B. Leschen), pp. 296–344. Walter de  
430 Gruyter, Berlin.
- 431 Wong, M.H. & T.D. Chan. 1977. The ecology of the marine rove beetle, *Bryothinusa* spp.  
432 (Coleoptera: Staphylinidae) in Hong Kong. *Hydrobiologia*, 53(2): 253–256.

433 Yamamoto, S., M. Maruyama & J. Parker. 2016. Evidence for social parasitism of early insect  
434 societies by Cretaceous rove beetles. *Nature Communications*, in press.

435

436

437 FIGURE CAPTIONS

438

439 Figures 1–8. Habitus of representative Termitohospitini. (1) *Termitohospes* undesc. sp. (2)  
440 *Paratermitosocius* undesc. sp. (3) *Termitosodalis* undesc. sp. (4) *Termitosocius microps*. (5)  
441 *Neotermitosocius bolivianus*. (6) *Blapticoxenus brunneus*. (7) *Coptotermocola clavicornis*. (8)  
442 *Coptoxenus* sp.

443

444 Figures 9–10. Termitohospitini in situ et in vitro. (9) *Coptoxenus* sp. in situ with host. (10a)  
445 *Sinophilus* sp. in vitro being groomed by host. (10b) *Sinophilus* sp. in vitro engaging in  
446 trophalaxis food exchange.

447

448 Figures 11–13. *Myllaena* sp. and Termitohospitini scanning electron micrograph images of  
449 various body parts. (11a) *Myllaena* sp. acinia. (11b) *Sinophilus* sp. lacinia. (12a) *Myllaena* sp.  
450 maxillary palpomere 3. (12b) *Termitohospes* sp. maxillary palpomere 3. (13a) *Myllaena* sp.  
451 anterior tentorial pit. (13b) *Termitohospes* sp. anterior tentorial pit.

452

453 Figure 14. Parsimony majority rule consensus tree with bootstrap values.

454

455 Figure 15. Bayesian Mk<sub>v</sub> +  $\Gamma(4)$  majority rule consensus tree with posterior probabilities.

456 Habitus illustrations from top to bottom: *Masuria* sp., *Myllaena* sp. and *Termitohospes* sp..

457

458 Figure 16. Bayesian Mk<sub>v</sub> +  $\Gamma(8)$  majority rule consensus tree with posterior probabilities.

459 Habitus illustrations from top to bottom: *Masuria* sp., *Myllaena* sp. and *Termitohospes* sp..

460

461 Figure 17. Parsimony majority rule consensus tree of Myllaenini *sensu nov* with body form and  
462 ecology Mk reconstructions.

1

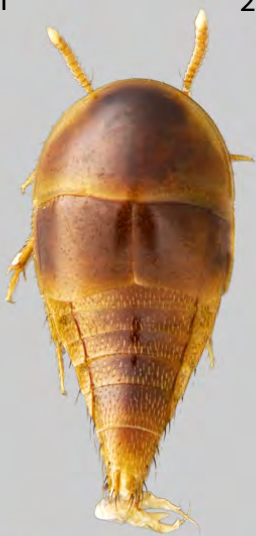

2

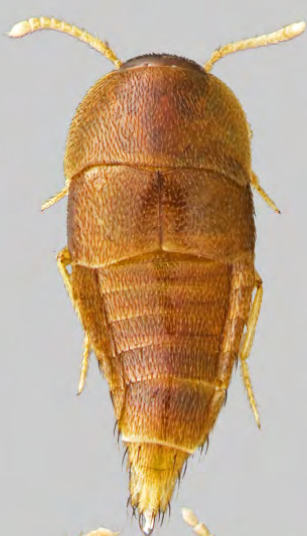

3

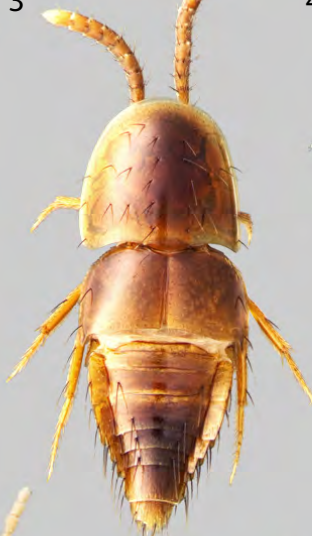

4

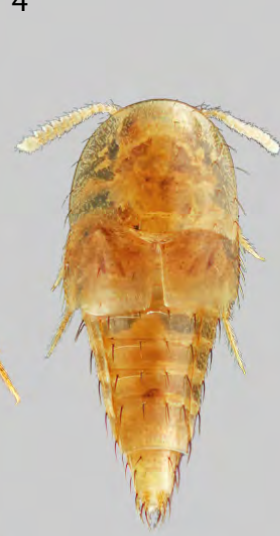

5

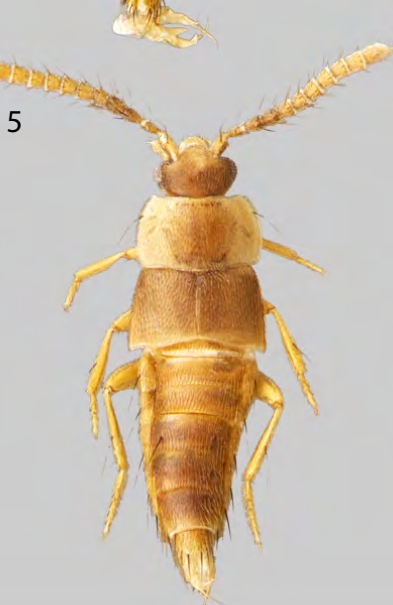

6

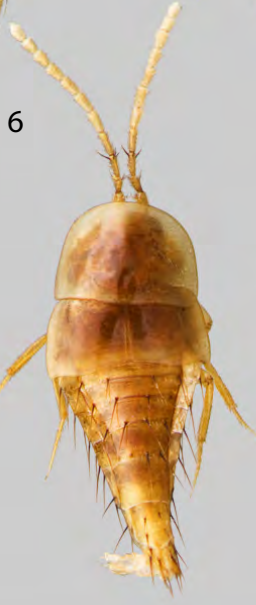

7

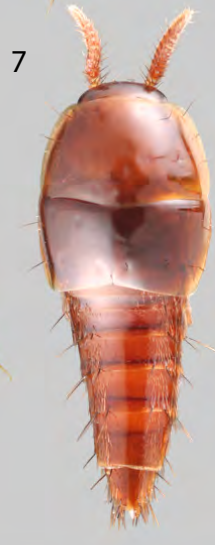

8

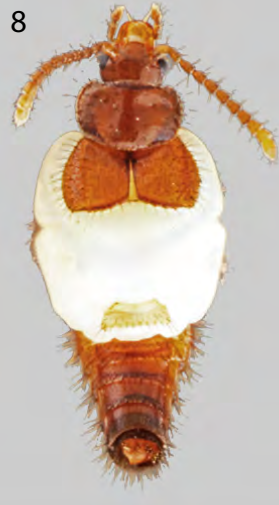



9a

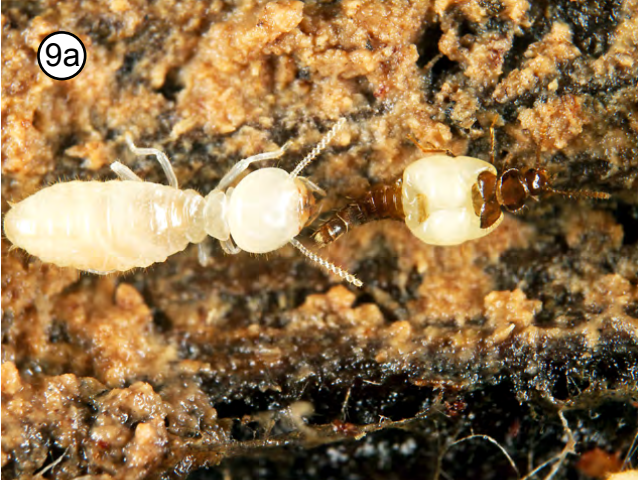

9b

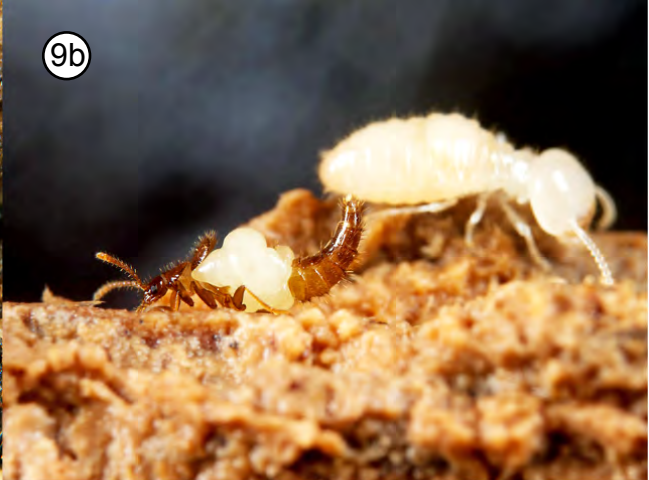

10a

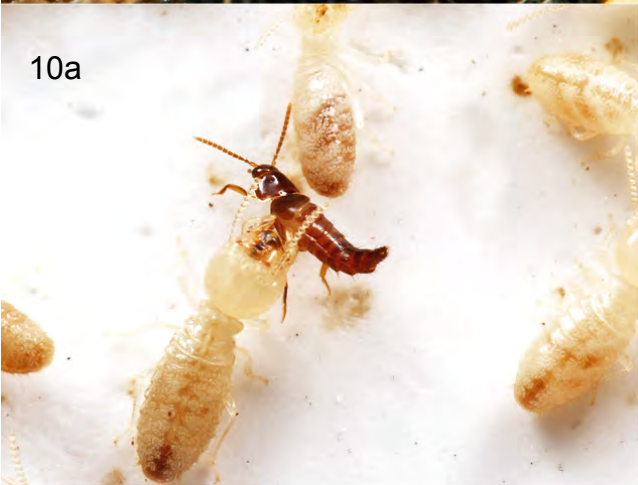

10b

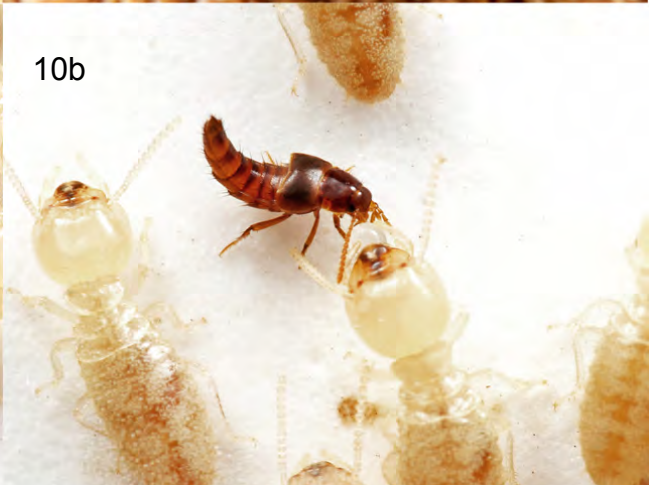

11a

11b

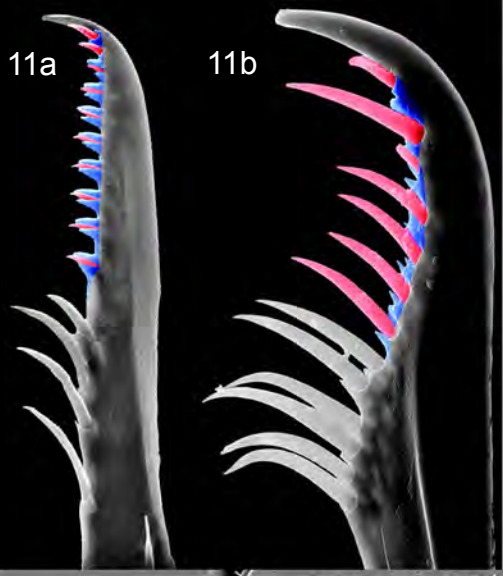

12a

12b

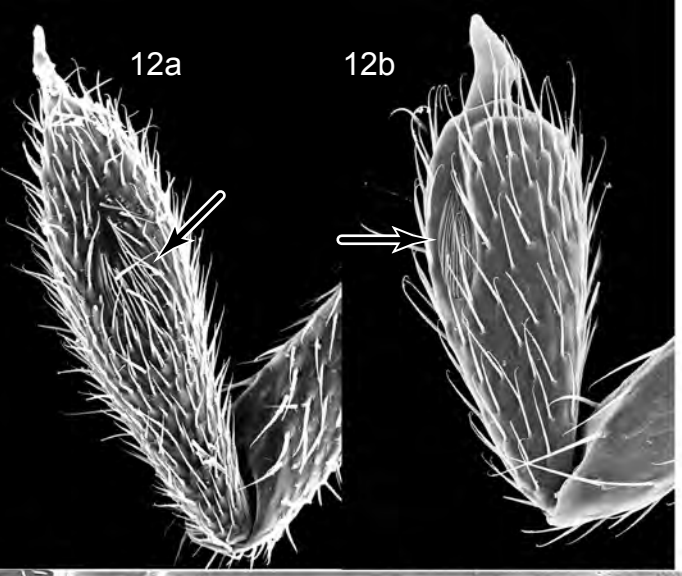

13a

13b

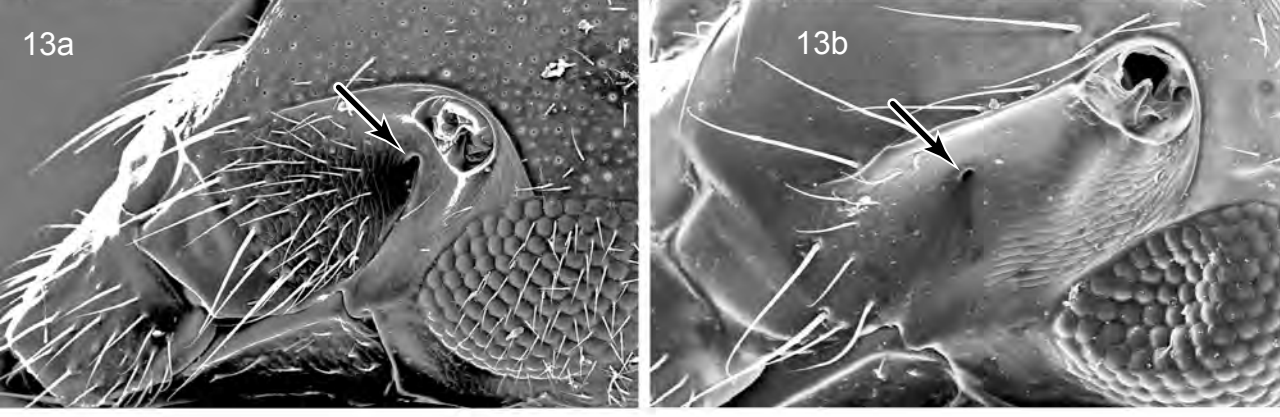

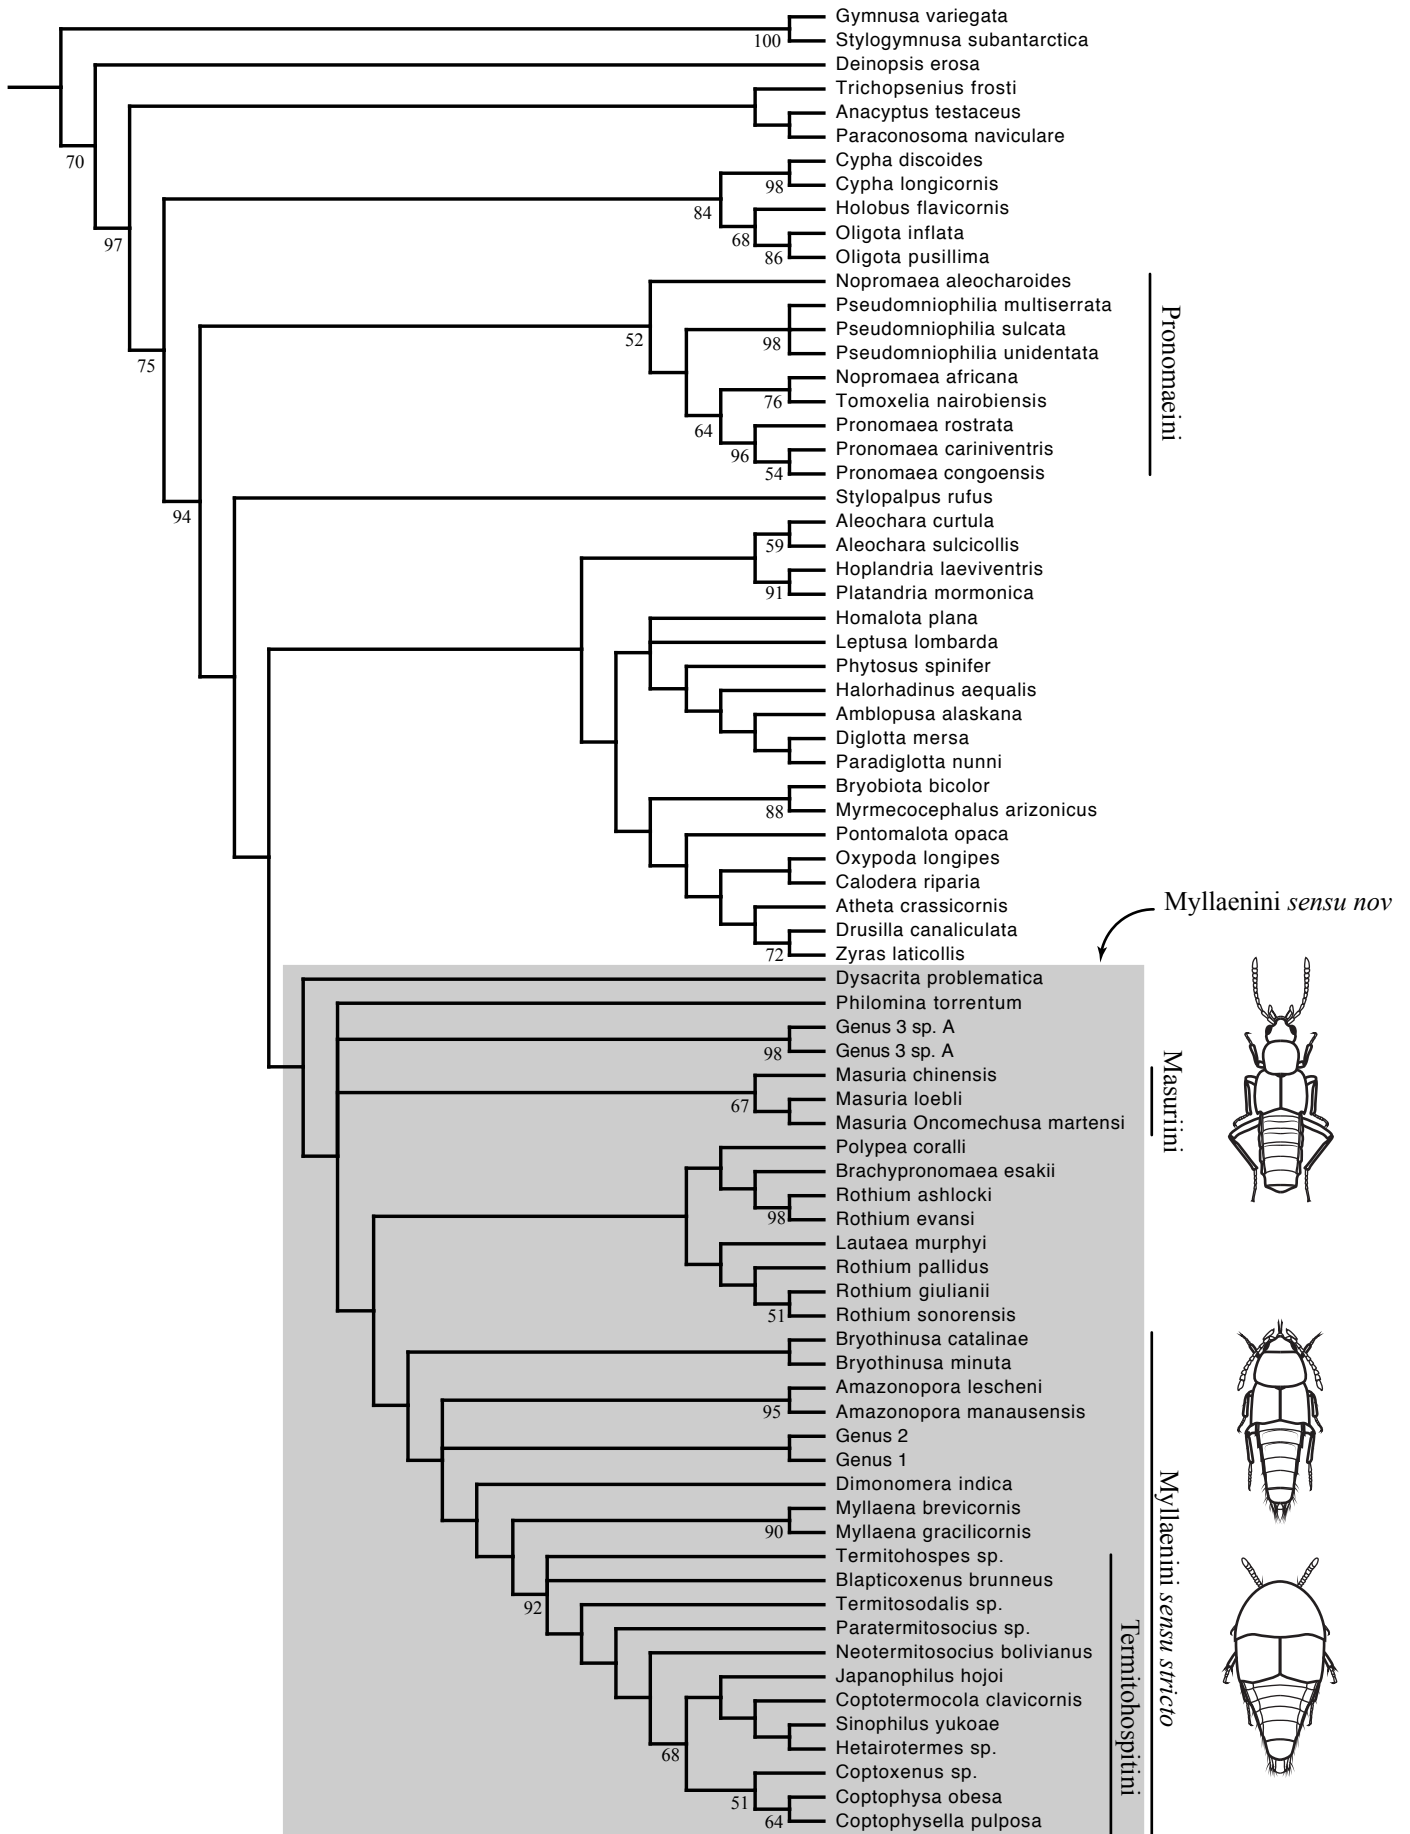

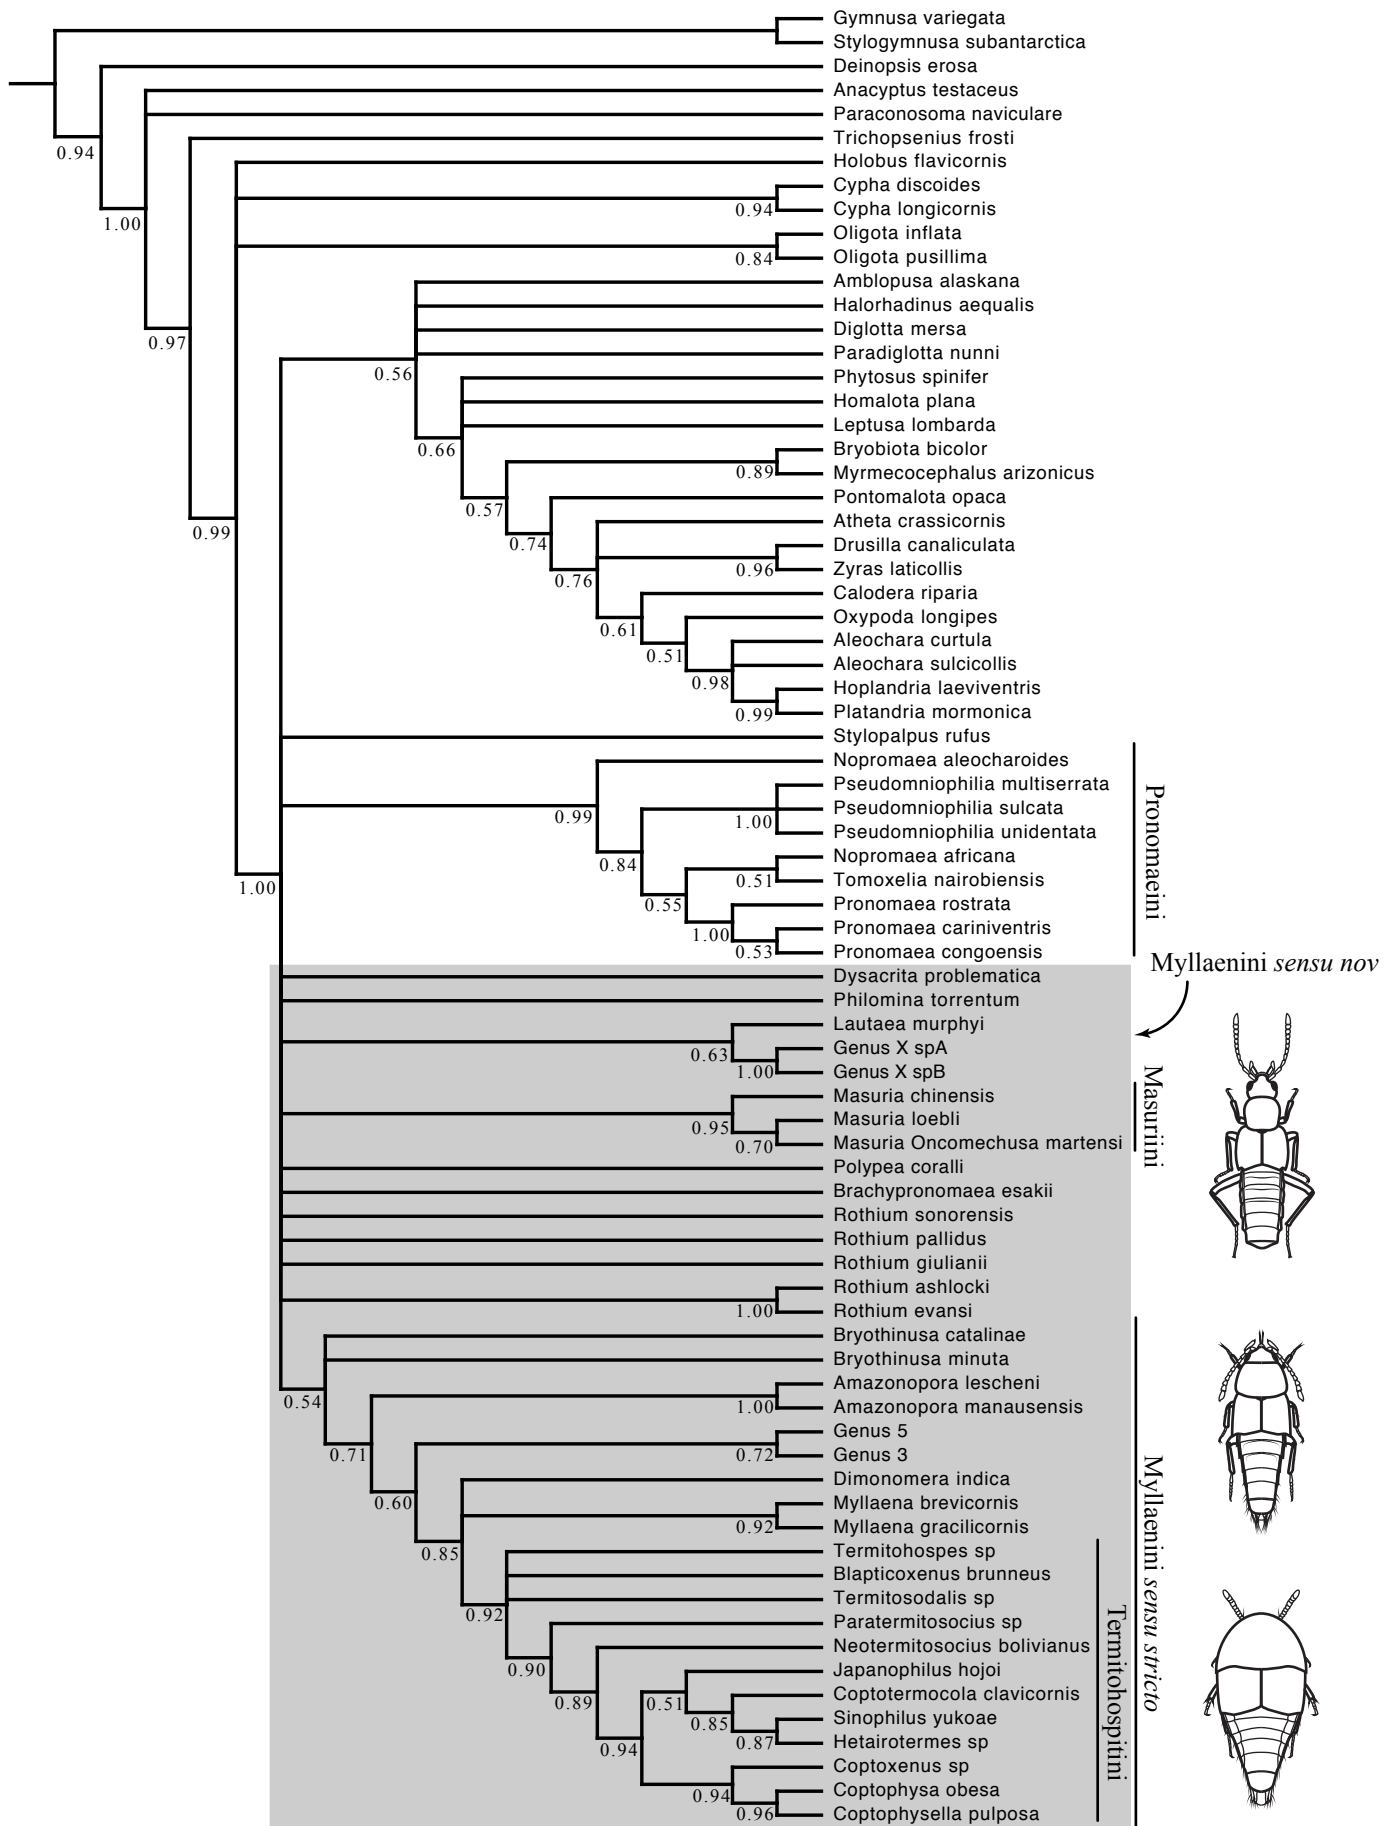

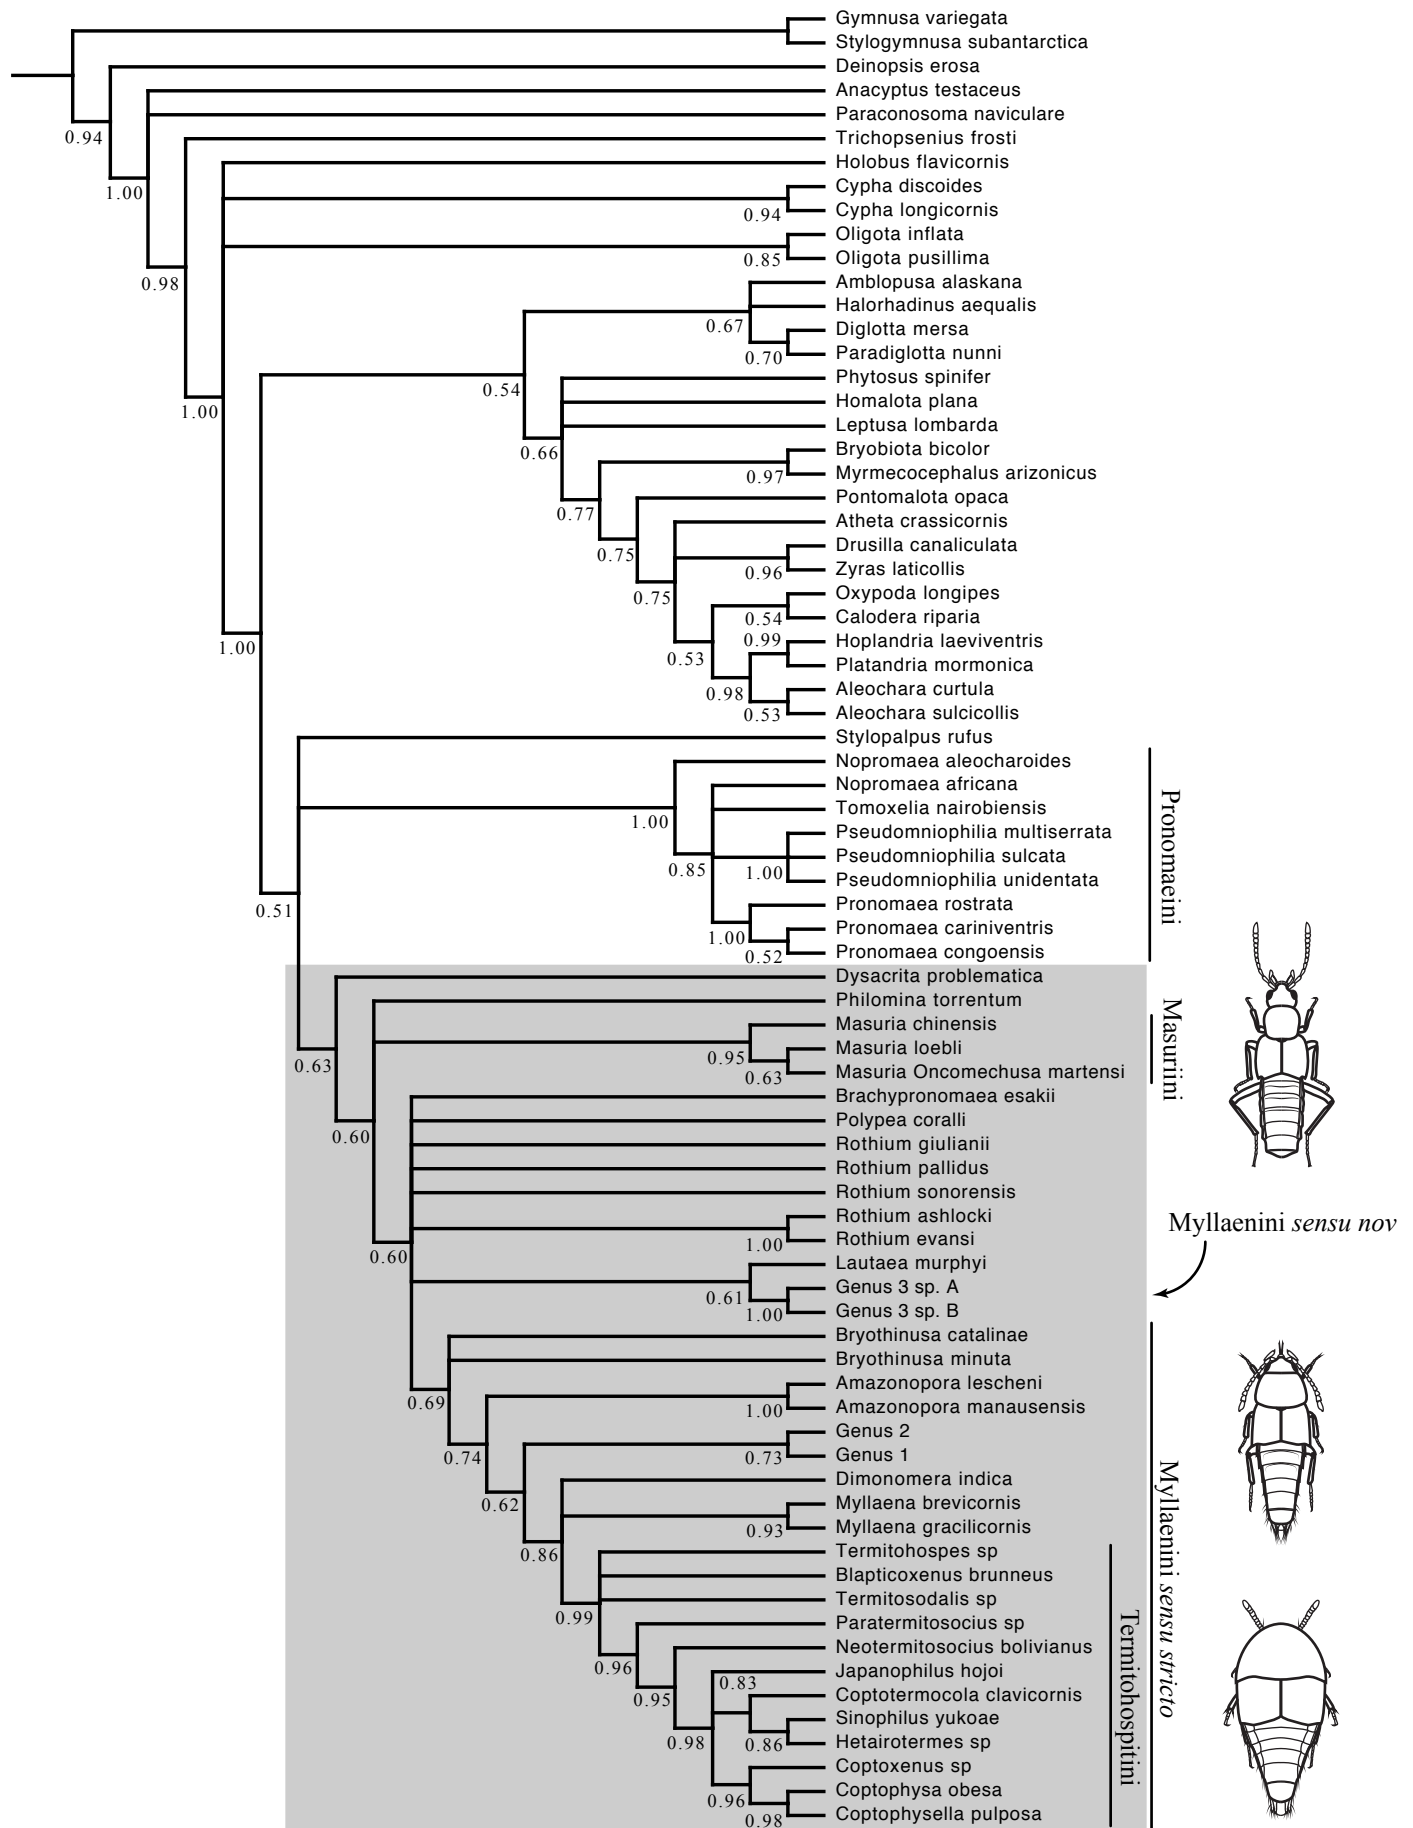

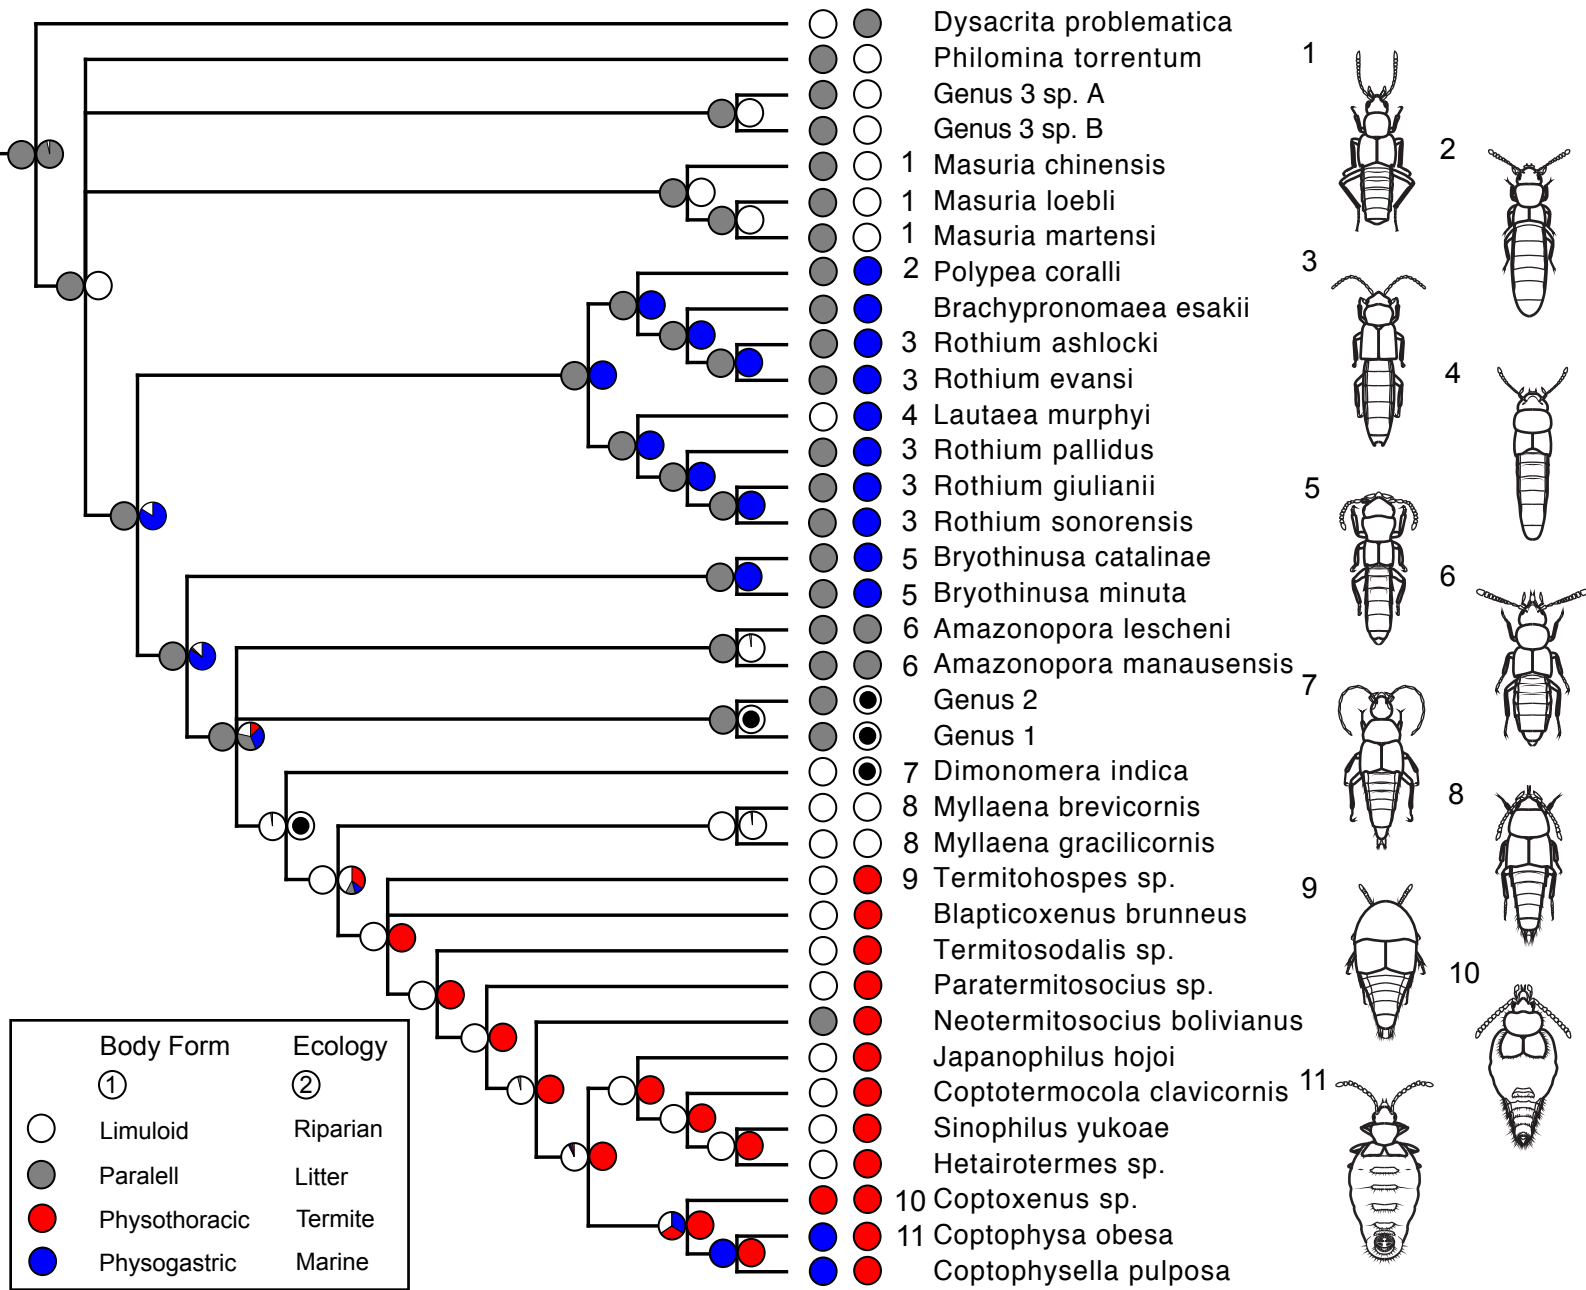

Source: https://www.biorxiv.org/content/10.1101/083881v1.full.pdf
